# Supplementary material for: Quality Control—A Stepchild in Quantitative Proteomics: A Case Study for the Human CSF Proteome
Source: MDPI journal article supplement (doi:10.3390/biom13030491), 2023-03-07
Supplement: s1 [file s1]

# Supplemental materials

## Quality control – a stepchild in quantitative proteomics: a case study for the human CSF proteome

Svitlana Rozanova<sup>1,2\*</sup>, Julian Uszkoreit<sup>1,2</sup>, Karin Schork<sup>1,2</sup>, Bettina Serschnitzki<sup>1,2</sup>, Martin Eisenacher<sup>1,2</sup>, Lars Tönges<sup>3</sup> and Katalin Barkovits-Boeddinghaus<sup>1,2,&</sup> and Katrin Marcus<sup>1,2,&</sup>

<sup>1</sup> Medical Proteome Analysis, Center for Protein Diagnostics (ProDi), Ruhr University Bochum, 44801 Bochum, Germany

<sup>2</sup> Medizinisches Proteom-Center, Medical Faculty, Ruhr University Bochum, 44801 Bochum, Germany

<sup>3</sup> Neurologische Klinik der Ruhr-Universität Bochum, St. Josef-Hospital, 44791 Bochum, Germany

\* Correspondence: svitlana.rozanova@ruhr-uni-bochum.de; Tel.: +49 (0)234 32-18087

& Equal contribution

## Table of contents

### MaCProQC – Mass spectrometry proteomics quality control workflow

**Table S1.** Comparison of CSF sample preparation protocols used for generation of dataset with qualitative differences.

**Table S2.** Raw data features taken for the PCA analysis and the scores.

**Tables S3.** Modifications found using MASCOT error tolerance search.

**Table S4.** The number of peptides and PGs quantified in the four datasets.

**Table S5.** Summary of the results obtained for different datasets

**Figure S1.** Peptide concentration determination using amino acid analysis.

**Figure S2.** TIC chromatographic profiles for the technical replicates for different CSF datasets.

**Figure S3.** Raw data quality assessment: quantile analysis of MS1- and MS2- ion intensities.

**Figure S4.** Box-plots based on the protein intensities.

**Figure S5.** Analysis of MA-Plots based on raw and LOESS-normalized intensities of PGs.

## **MaCProQC – Mass spectrometry proteomics quality control workflow**

The workflow for the calculation and assembly of quality control (QC) metrics described in the manuscript was implemented as a KNIME workflow. While at the institute a server-based version was used, we published a locally runnable version at <https://hub.knime.com/julianu/spaces/MaCProQC/latest/>.

The workflow in a nutshell accepts Thermo RAW or mzML files, extracts several QC metrics on these raw data, performs a spectrum identification (using Mascot by Matrixscience) and furthermore uses OpenMS for feature detection and identification mapping. For visualization we created bar plots or scatter plots of PCA (principal component analyses), as shown in the main manuscript. Alternatively, also the pure number in a table could be inspected.

The following metrics, which are also described in [1], were calculated on the unprocessed “raw” file level:

- retention time (RT) duration of the MS run
- number of total MS1 and MS2 events / spectra
- accumulated TICs
- the interval when the first/second/third/fourth 25% of TIC accumulates divided by RT-duration
- the interval for the first/second/third/fourth 25% of all MS respectively MS/MS events divided by RT-duration
- log ratio for 50%ile of TIC changes over 25%ile of TIC changes
- log ratio for 75%ile of TIC changes over 50%ile of TIC changes
- log ratio for largest TIC change over 75%ile of TIC changes
- log ratio for 50%ile of TIC over 25%ile of TIC
- log ratio for 75%ile of TIC over 50%ile of TIC
- log ratio for largest TIC over 75%ile TIC
- maximum of the MS and MS/MS frequency (per minute)
- the 25%ile of MS respectively MS/MS scan peak counts?
- the 50%ile of MS respectively MS/MS scan peak counts?
- the 75%ile of MS respectively MS/MS scan peak counts?
- the fraction of 1, 2, 3, 4, 5 or more charged precursors

On the identifications level, the peptide spectrum matches were filtered on a 1% FDR level using the target-decoy approach on a concatenated 1-to-1 target decoy database using PIA [2] and the following metrics were returned:

- fraction of PSMs with charge 1, 2, 3, 4, 5
- fraction of PSMs with missed cleavage sites for 0, 1, 2, 3 missed cleavages
- total number of (FDR filtered) PSMs, peptides and protein groups

Furthermore, peptide features were detected using the FeatureFinderMultiplex by OpenMS [3] for each separate file and mapped the 1% FDR filtered PSMs from the prior step to these. On this very rudimentary single-file quantitative data the following metrics were extracted:

- the total number of peptide features
- the number of identified peptide features
- the fraction of features with charge 2, 3, 4 and 5 (only these charge states were detected)

- [1] Wang X, Chambers MC, Vega-Montoto LJ, Bunk DM, Stein SE, Tabb DL. QC metrics from CPTAC raw LC-MS/MS data interpreted through multivariate statistics. *Anal Chem*. 2014 Mar 4;86(5):2497-509. doi: 10.1021/ac4034455. Epub 2014 Feb 17. PMID: 24494671; PMCID: PMC3982976.
- [2] Uszkoreit J, Maerkens A, Perez-Riverol Y, Meyer HE, Marcus K, Stephan C, Kohlbacher O, Eisenacher M. PIA: An Intuitive Protein Inference Engine with a Web-Based User Interface. *J Proteome Res*. 2015 Jul 2;14(7):2988-97. doi: 10.1021/acs.jproteome.5b00121. Epub 2015 Jun 10. PMID: 25938255.
- [3] Pfeuffer J, Sachsenberg T, Alka O, Walzer M, Fillbrunn A, Nilse L, Schilling O, Reinert K, Kohlbacher O. OpenMS - A platform for reproducible analysis of mass spectrometry data. *J Biotechnol*. 2017 Nov 10;261:142-148. doi: 10.1016/j.jbiotec.2017.05.016. Epub 2017 May 27. PMID: 28559010.

**Table S1.** Comparison of CSF sample preparation protocols used for generation of dataset with qualitative differences.

| Dataset              | CSF, $\mu\text{g}$ of protein | Buffer                                      | Reduction                   | Alkylation                            | Application on a filter                                                                                                                                                                                                                | Enzyme, ratio to protein  | Digestion         | Stop of the reaction                                                                                                                         |
|----------------------|-------------------------------|---------------------------------------------|-----------------------------|---------------------------------------|----------------------------------------------------------------------------------------------------------------------------------------------------------------------------------------------------------------------------------------|---------------------------|-------------------|----------------------------------------------------------------------------------------------------------------------------------------------|
| Standard in-solution | 25                            | 1:1 v/v 0.2% RapiGest (Waters)              | 5mM DDT<br>30 min at 60°C   | 15 mM IAA<br>30 min at RT in darkness | -                                                                                                                                                                                                                                      | Trypsin (Serva)<br>1:50   | Overnight<br>37°C | 0.5% TFA 45 min 37°C.<br>Centrifugation at 14000xg                                                                                           |
| Rapid in-solution    | 25                            | 1:3 v/v 0.2% RapiGest Buffer (Promega)      | 2 mM TCEP<br>45 min at 37°C | 5 mM IAA<br>60 min at RT in darkness  | -                                                                                                                                                                                                                                      | Trypsin (Promega)<br>1:10 | 60 min<br>70°C    | 0.5% TFA                                                                                                                                     |
| Standard FASP        | 25                            | 1:4 v/v 8M Urea                             | 10 mM DTT<br>60 min at 37°C | 15 mM IAA<br>30 min at RT in darkness | Vivacon filter (0.5 ml, 10.000 MWCO Sartorius), centrifugation for 15 min at 12000 x g. Washing twice with 200 $\mu\text{l}$ of 8 M Urea and 3 times with 200 $\mu\text{l}$ of Ambic. Re-suspend with 20 $\mu\text{l}$ of 50 mM Ambic. | Trypsin (Serva)<br>1:50   | Overnight<br>37°C | Elution by adding 50 $\mu\text{l}$ of 50 mM Ambic and 15 min centrifugation at 14000 xg at 18°C. Digestion was stopped by 0.5% TFA. 0.5% TFA |
| Rapid FASP           | 25                            | 1:3 v/v with 0.2% RapiGest Buffer (Promega) | 2 mM TCEP<br>45 min at 37°C | 5 mM IAA<br>60 min at RT in darkness  | Vivacon filter (0.5 ml, 10.000 MWCO Sartorius), centrifugation for 15 min at 12000 x g. Washing twice with 200 $\mu\text{l}$ of Rapid Digest. Re-suspend in 20 $\mu\text{l}$ of Rapid Digest Buffer.                                   | Trypsin (Promega)<br>1:10 | 60 min<br>70°C    | Elution by adding 50 $\mu\text{l}$ of 50 mM Ambic and 15 min centrifugation at 14000 xg at 18°C. Digestion was stopped by 0.5% TFA. 0.5% TFA |

**Tables S2.** Raw data features taken for the PCA and their influence on the lengths of rotation vectors for PC1 and PC2. A – PCA on raw data, B – PCA on all data.

**A**

| RowID               | PC1    | PC2    | length |
|---------------------|--------|--------|--------|
| total_nr_MS2        | 0.246  | 0.047  | 0.250  |
| RT-MS2-Q3           | 0.243  | -0.089 | 0.258  |
| MS2-Density-Q1      | 0.239  | 0.001  | 0.239  |
| RT-MS2-Q2           | 0.233  | 0.113  | 0.259  |
| MS2-Density-Q2      | 0.229  | -0.011 | 0.230  |
| MS2-PrecZ-4         | 0.229  | 0.040  | 0.232  |
| MS1-TIC-Q2          | 0.226  | -0.130 | 0.261  |
| MS2-Density-Q3      | 0.205  | -0.063 | 0.214  |
| MS2-PrecZ-5         | 0.193  | -0.076 | 0.207  |
| RT-TIC-Q3           | 0.187  | 0.182  | 0.261  |
| MS2-PrecZ-more      | 0.178  | -0.073 | 0.192  |
| MS2-Freq-Max        | 0.159  | 0.201  | 0.256  |
| MS1-TIC-Change-Q2   | 0.151  | -0.125 | 0.196  |
| accumulated_MS2_TIC | 0.150  | -0.166 | 0.223  |
| RT-MS1-Q3           | 0.135  | 0.180  | 0.225  |
| MS2-PrecZ-3         | 0.126  | 0.192  | 0.230  |
| RT-TIC-Q2           | 0.119  | -0.086 | 0.147  |
| RT-MS1-Q4           | 0.092  | -0.305 | 0.318  |
| MS1-Density-Q1      | 0.048  | 0.306  | 0.310  |
| RT-TIC-Q1           | 0.039  | 0.099  | 0.107  |
| MS1-Density-Q2      | 0.037  | 0.301  | 0.304  |
| RT-MS2-Q1           | 0.028  | -0.320 | 0.321  |
| MS2-PrecZ-1         | 0.000  | 0.000  | 0.000  |
| MS1-TIC-Change-Q4   | -0.005 | 0.182  | 0.182  |
| MS1-TIC-Change-Q3   | -0.037 | 0.087  | 0.095  |
| RT-MS1-Q2           | -0.043 | 0.318  | 0.321  |
| RT_duration         | -0.064 | -0.080 | 0.102  |
| MS1-Density-Q3      | -0.065 | 0.107  | 0.126  |
| MS1-Freq-Max        | -0.066 | 0.029  | 0.072  |
| MS1-TIC-Q4          | -0.066 | 0.238  | 0.247  |
| accumulated_MS1_TIC | -0.088 | -0.265 | 0.280  |
| RT-MS2-Q4           | -0.194 | 0.202  | 0.280  |
| MS1-TIC-Q3          | -0.219 | 0.074  | 0.231  |
| RT-TIC-Q4           | -0.223 | -0.126 | 0.256  |
| total_nr_MS1        | -0.233 | -0.096 | 0.252  |
| MS2-PrecZ-2         | -0.240 | -0.043 | 0.244  |
| RT-MS1-Q1           | -0.243 | -0.009 | 0.243  |

**B**

| RowID                          | PC1    | PC2    | length |
|--------------------------------|--------|--------|--------|
| psmZ-2                         | 0.196  | -0.003 | 0.196  |
| MS2-PrecZ-2                    | 0.186  | -0.057 | 0.194  |
| FeatureZ-2                     | 0.185  | -0.064 | 0.196  |
| psm-missed-0                   | 0.184  | 0.019  | 0.185  |
| RT-MS1-Q1                      | 0.180  | -0.034 | 0.183  |
| MS1-TIC-Q3                     | 0.178  | 0.055  | 0.186  |
| total_nr_MS1                   | 0.167  | -0.118 | 0.204  |
| RT-TIC-Q4                      | 0.156  | -0.144 | 0.212  |
| RT-MS2-Q4                      | 0.149  | 0.167  | 0.224  |
| MS1-Density-Q3                 | 0.064  | 0.095  | 0.114  |
| MS1-TIC-Q4                     | 0.061  | 0.223  | 0.232  |
| accumulated_MS1_TIC            | 0.058  | -0.255 | 0.261  |
| RT_duration                    | 0.048  | -0.075 | 0.089  |
| RT-MS1-Q2                      | 0.044  | 0.294  | 0.297  |
| MS1-Freq-Max                   | 0.042  | 0.011  | 0.044  |
| MS1-TIC-Change-Q3              | 0.038  | 0.086  | 0.093  |
| MS2-PrecZ-1                    | 0.000  | 0.000  | 0.000  |
| FeatureZ-1                     | 0.000  | 0.000  | 0.000  |
| psmZ-1                         | 0.000  | 0.000  | 0.000  |
| MS1-TIC-Change-Q4              | -0.007 | 0.164  | 0.164  |
| MS1-Density-Q2                 | -0.020 | 0.285  | 0.286  |
| RT-TIC-Q1                      | -0.025 | 0.105  | 0.108  |
| MS1-Density-Q1                 | -0.026 | 0.294  | 0.296  |
| RT-MS2-Q1                      | -0.029 | -0.295 | 0.296  |
| RT-TIC-Q2                      | -0.085 | -0.072 | 0.111  |
| FeatureZ-3                     | -0.085 | 0.194  | 0.212  |
| RT-MS1-Q3                      | -0.085 | 0.193  | 0.211  |
| RT-MS1-Q4                      | -0.086 | -0.283 | 0.296  |
| MS2-PrecZ-3                    | -0.092 | 0.201  | 0.221  |
| MS1-TIC-Change-Q2              | -0.103 | -0.091 | 0.138  |
| MS2-Freq-Max                   | -0.106 | 0.208  | 0.234  |
| accumulated_MS2_TIC            | -0.113 | -0.137 | 0.178  |
| psm-missed-3                   | -0.115 | -0.103 | 0.154  |
| RT-TIC-Q3                      | -0.131 | 0.190  | 0.231  |
| number-filtered-psms           | -0.134 | -0.127 | 0.184  |
| number-filtered-protein-groups | -0.137 | 0.021  | 0.138  |
| MS2-PrecZ-more                 | -0.141 | -0.063 | 0.154  |
| MS2-Density-Q3                 | -0.152 | -0.038 | 0.157  |
| FeatureZ-5                     | -0.154 | -0.057 | 0.164  |
| MS2-PrecZ-5                    | -0.156 | -0.065 | 0.169  |
| number-filtered-peptides       | -0.161 | -0.043 | 0.167  |
| identified_nr_features         | -0.162 | -0.043 | 0.168  |
| MS2-Density-Q2                 | -0.170 | 0.011  | 0.170  |
| RT-MS2-Q2                      | -0.171 | 0.132  | 0.216  |
| psmZ-5                         | -0.173 | -0.087 | 0.194  |
| MS2-PrecZ-4                    | -0.174 | 0.052  | 0.181  |
| psm-missed-2                   | -0.174 | -0.031 | 0.177  |
| FeatureZ-4                     | -0.176 | 0.066  | 0.188  |
| MS2-Density-Q1                 | -0.179 | 0.022  | 0.180  |
| total_nr_MS2                   | -0.180 | 0.072  | 0.194  |
| MS1-TIC-Q2                     | -0.182 | -0.104 | 0.210  |
| RT-MS2-Q3                      | -0.183 | -0.059 | 0.192  |
| psm-missed-1                   | -0.184 | -0.013 | 0.185  |
| psmZ-4                         | -0.185 | -0.060 | 0.194  |
| psmZ-3                         | -0.194 | 0.042  | 0.199  |

**Tables S3.** Modifications found using MASCOT error tolerance search

### A. Standard in-solution

|                       |           |        | Std in-sol 1  | Std in-sol 2  | Std in-sol 3  | Std in-sol 4  | Std in-sol 5  |
|-----------------------|-----------|--------|---------------|---------------|---------------|---------------|---------------|
| Modification          | Delta     | Site   | Total matches |
| Carbamidomethyl       | 57.021464 | C      | 1558          | 1666          | 1568          | 1589          | 1617          |
| Non-specific cleavage |           | -      | 798           | 806           | 848           | 863           | 801           |
| Carbamidomethyl       | 57.021457 | N-term | 498           | 528           | 543           | 548           | 493           |
| Oxidation             | 15.994915 | M      | 428           | 483           | 467           | 487           | 448           |
| Gly                   | 57.021464 | K      | 289           | 288           | 262           | 284           | 259           |
| Gly                   | 57.021464 | S      | 253           | 270           | 245           | 268           | 268           |
| Deamidated            | 0.984016  | N      | 252           | 266           | 243           | 258           | 254           |
| Gly                   | 57.021464 | T      | 192           | 197           | 218           | 220           | 186           |
| Carbamidomethyl       | 57.021464 | E      | 132           | 128           | 147           | 145           | 115           |
| GlyGly                | 114.04293 | C      | 131           | 127           | 130           | 132           | 124           |
| Dethiomethyl          | -48.00337 | M      | 112           | 124           | 114           | 102           | 120           |
| Gln->pyro-Glu         | -17.02653 | N-term | 78            | 89            | 86            | 89            | 84            |
| Oxidation             | 15.994915 | P      | 63            | 89            | 72            | 58            | 61            |
| Carboxymethyl         | 58.005479 | C      | 66            | 78            | 66            | 80            | 71            |
| Carbamidomethyl       | 57.021464 | Y      | 66            | 68            | 70            | 74            | 68            |
| Carboxymethyl         | 58.005481 | N-term | 62            | 73            | 62            | 65            | 55            |
| Carbamidomethyl       | 57.021464 | D      | 56            | 68            | 66            | 79            | 59            |
| GlyGly                | 114.04293 | K      | 51            | 62            | 57            | 56            | 57            |
| Carbamidomethyl       | 57.021464 | H      | 42            | 54            | 56            | 59            | 56            |

### B. Rapid Digest in-solution

|                       |          |        | Rapid in-sol 1 | Rapid in-sol 2 | Rapid in-sol 3 | Rapid in-sol 4 | Rapid in-sol 5 |
|-----------------------|----------|--------|----------------|----------------|----------------|----------------|----------------|
| Modification          | Delta    | Site   | Total matches  |
| Carbamidomethyl       | 57.02146 | C      | 2290           | 2175           | 2396           | 2208           | 2388           |
| Oxidation             | 15.99492 | M      | 727            | 647            | 747            | 704            | 729            |
| Non-specific cleavage |          | -      | 583            | 559            | 586            | 583            | 563            |
| Carbamidomethyl       | 57.02146 | N-term | 329            | 368            | 321            | 320            | 305            |
| Gly                   | 57.02146 | S      | 213            | 226            | 198            | 197            | 211            |
| Gly                   | 57.02146 | T      | 197            | 208            | 210            | 187            | 179            |
| Deamidated            | 0.984016 | N      | 187            | 174            | 186            | 172            | 177            |
| Gly                   | 57.02146 | K      | 170            | 196            | 178            | 172            | 163            |
| Carbamidomethyl       | 57.02146 | E      | 122            | 123            | 128            | 94             | 112            |
| GlyGly                | 114.0429 | C      | 102            | 114            | 94             | 91             | 102            |
| Oxidation             | 15.99492 | P      | 101            | 87             | 106            | 104            | 98             |
| Gln->pyro-Glu         | -17.0265 | N-term | 81             | 81             | 82             | 90             | 86             |
| Cys->Dha              | -33.9877 | C      | 64             | 57             | 73             | 61             | 60             |
| Carboxymethyl         | 58.00548 | C      | 46             | 52             | 70             | 62             | 59             |
| Dethiomethyl          | -48.0034 | M      | 58             | 61             | 50             | 52             | 49             |

### C. Standard FASP

|                       |          |        | Std FASP 1    | Std FASP 2    | Std FASP 3    | Std FASP 4    | Std FASP 5    |
|-----------------------|----------|--------|---------------|---------------|---------------|---------------|---------------|
| Modification          | Delta    | Site   | Total matches |
| Carbamidomethyl       | 57.02146 | C      | 1905          | 2185          | 2621          | 2030          | 2327          |
| Oxidation             | 15.99492 | M      | 936           | 930           | 1087          | 935           | 1061          |
| Non-specific cleavage |          | -      | 672           | 641           | 773           | 744           | 747           |
| Carbamyl              | 43.00582 | N-term | 763           | 423           | 128           | 190           | 507           |
| Gly                   | 57.02146 | S      | 171           | 165           | 142           | 184           | 158           |
| Carbamidomethyl       | 57.02146 | N-term | 131           | 143           | 106           | 155           | 150           |
| Gly                   | 57.02146 | T      | 127           | 141           | 123           | 125           | 128           |
| Deamidated            | 0.984016 | N      | 130           | 121           | 131           | 106           | 117           |
| Oxidation             | 15.99492 | P      | 70            | 102           | 116           | 81            | 107           |
| Gln->pyro-Glu         | -17.0265 | N-term | 82            | 89            | 111           | 94            | 99            |
| Carbamidomethyl       | 57.02146 | E      | 97            | 82            | 58            | 77            | 78            |
| Carbamyl              | 43.00581 | K      | 114           | 77            | 26            | 29            | 86            |
| Gly                   | 57.02146 | K      | 56            | 62            | 58            | 65            | 54            |

### D. Rapid Digest FASP

|                       |          |        | Rapid FASP1   | Rapid FASP2   | Rapid FASP3   | Rapid FASP4   | Rapid FASP5   |
|-----------------------|----------|--------|---------------|---------------|---------------|---------------|---------------|
| Modification          | Delta    | Site   | Total matches |
| Carbamidomethyl       | 57.02146 | C      | 2043          | 2012          | 1934          | 2114          | 2078          |
| Non-specific cleavage |          | -      | 866           | 1022          | 1066          | 873           | 986           |
| Oxidation             | 15.99492 | M      | 582           | 633           | 707           | 584           | 612           |
| Gly                   | 57.02146 | S      | 180           | 157           | 153           | 168           | 170           |
| Deamidated            | 0.984016 | N      | 154           | 201           | 234           | 143           | 165           |
| Gln->pyro-Glu         | -17.0265 | N-term | 74            | 86            | 100           | 86            | 80            |
| Oxidation             | 15.99492 | P      | 69            | 80            | 131           | 62            | 160           |
| Carbamidomethyl       | 57.02146 | N-term | 69            | 60            | 61            | 64            | 61            |
| Gly                   | 57.02146 | K      | 51            | 43            | 39            | 48            | 43            |
| Gly                   | 57.02146 | T      | 50            | 41            | 49            | 47            | 37            |

**Table S4.** The number of peptides and PGs quantified in the four datasets.

| Protocol             | Quantified peptides | Peptides overlap for the 5 replicates | Quantified PGs | PGs overlap for the 5 replicates |
|----------------------|---------------------|---------------------------------------|----------------|----------------------------------|
| Standard in-solution | 3200                | 1825 (57%)                            | 515            | 332 (64%)                        |
| Rapid in-solution    | 3902                | 2275 (58%)                            | 539            | 369 (68%)                        |
| Standard FASP        | 4678                | 2299 (49%)                            | 615            | 386 (63%)                        |
| Rapid FASP           | 3080                | 1493 (48%)                            | 496            | 277 (56%)                        |

**Table S5.** Summary of the results obtained for different datasets.

| Level of assessment                     | Parameter                                                                                    | Standard in-solution                                                                                  | Rapid in-solution                                                                                     | Standard FASP                                                                                         | Rapid FASP                                                                                                         |
|-----------------------------------------|----------------------------------------------------------------------------------------------|-------------------------------------------------------------------------------------------------------|-------------------------------------------------------------------------------------------------------|-------------------------------------------------------------------------------------------------------|--------------------------------------------------------------------------------------------------------------------|
| Raw data<br>(MaCProQC tool)             | Number of MS1 scans                                                                          | 9347<br>CV=2.1%                                                                                       | 9218<br>CV=0.7%                                                                                       | 9273<br>CV=1.8%                                                                                       | 10363<br>CV=6.7%                                                                                                   |
|                                         | Number of MS2 scans                                                                          | 38121<br>CV=1.9%                                                                                      | 39294<br>CV=0.8%                                                                                      | 38902<br>CV=1.2%                                                                                      | 35438<br>CV=5.9%                                                                                                   |
|                                         | MS1 accumulated intensity                                                                    | 6.06E+12<br>CV=13.3%                                                                                  | 7.86E+12<br>CV=19.0%                                                                                  | 8.51E+12<br>CV=17.4%                                                                                  | 1.01E+13<br>CV=13.2%                                                                                               |
|                                         | TIC quantile distribution                                                                    | One outlier<br>(shift of the 1 <sup>st</sup> and 2 <sup>nd</sup> quantiles)                           | No severe difference for the replicates                                                               | No severe difference for the replicates                                                               | Chromatogram intensity variation for all 5 replicates (shift of the 3 <sup>rd</sup> and 4 <sup>th</sup> quantiles) |
|                                         | Precursor charge state distribution                                                          | Stable precursor charge distribution for the replicates.                                              | Stable precursor charge distribution for the replicates. Enhanced number of highly charged ions.      | Highly varying precursor charge distribution for the replicates.                                      | Slight variations in precursor charge distribution for the replicates.                                             |
|                                         | Summary PCA                                                                                  | Low intragroup variability.                                                                           | Low intragroup variability.                                                                           | Low intragroup variability.                                                                           | High intragroup variability.                                                                                       |
| Identification level<br>(MaCProQC tool) | Number of PSMs                                                                               | 6851<br>CV=2.3%                                                                                       | 8619<br>CV=3.3%                                                                                       | 9592<br>CV=6.7%                                                                                       | 7302<br>CV=7.7%                                                                                                    |
|                                         | Number of identified peptides                                                                | 2526<br>CV=3.2%                                                                                       | 3109<br>CV=2.2%                                                                                       | 3413<br>CV=6.5%                                                                                       | 2366<br>CV=9.2%                                                                                                    |
|                                         | Number of identified PGs                                                                     | 416<br>CV=2.0%                                                                                        | 444<br>CV=3.4%                                                                                        | 495<br>CV=4.4%                                                                                        | 381<br>CV=10.9%                                                                                                    |
|                                         | PSMs with 1-3 missed cleavages                                                               | 14.6%                                                                                                 | 22%                                                                                                   | 19.6%                                                                                                 | 6.4%                                                                                                               |
|                                         | Distribution of PSMs based on missed cleavages                                               | Stable distribution for the replicates.                                                               | Stable distribution for the replicates.                                                               | Highly varying distribution for the replicates.                                                       | Stable distribution for the replicates.                                                                            |
|                                         | Summary PCA                                                                                  | Low intragroup variability.                                                                           | Low intragroup variability.                                                                           | Slightly higher intergroup separation                                                                 | High intragroup variability.                                                                                       |
| QC for label-free quantification        | Number of quantified peptides in total                                                       | 3200                                                                                                  | 3902                                                                                                  | 4678                                                                                                  | 3080                                                                                                               |
|                                         | Data completeness (number of overlapping peptides)                                           | 1825                                                                                                  | 2275                                                                                                  | 2299                                                                                                  | 1493                                                                                                               |
|                                         | Number of quantified protein groups in total                                                 | 515                                                                                                   | 539                                                                                                   | 615                                                                                                   | 496                                                                                                                |
|                                         | Data completeness (number of overlapping PGs)                                                | 332                                                                                                   | 369                                                                                                   | 386                                                                                                   | 277                                                                                                                |
|                                         | Similarity of the replicates based on clustering (Pearson correlation coefficient, peptides) | 0.96-0.97                                                                                             | 0.96-0.98                                                                                             | 0.90-0.96                                                                                             | 0.88-0.97                                                                                                          |
|                                         | Similarity of the replicates based on clustering (Pearson correlation coefficient, PGs)      | 0.97-0.98                                                                                             | 0.96-0.98                                                                                             | 0.96-0.98                                                                                             | 0.82-0.97                                                                                                          |
|                                         | Efficiency of data normalization                                                             | Both LOESS and MaxQuant LFQ normalization worked comparably well, improving the replicate clustering. | Both LOESS and MaxQuant LFQ normalization worked comparably well, improving the replicate clustering. | Both LOESS and MaxQuant LFQ normalization worked comparably well, improving the replicate clustering. | Most divergent dataset. Both LOESS and MaxQuant LFQ normalization were not effective.                              |

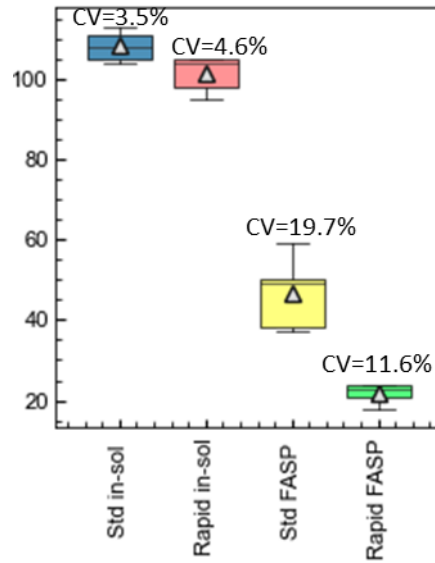

**Figure S1. Peptide concentration determination using amino acid analysis.**

Recovery of 25µg of CSF protein (based on Bradford assay) after different digestion approaches. The percentage of recovery higher than 100% is attributed to the differences in the protein concentration determination before and after digestion: Bradford assay and AAA respectively. Std in-sol – standard in solution digestion, Rapid in sol – rapid in solution digestion, Std FASP - standard filter added preparation, Rapid FASP - rapid filter added preparation, CV – coefficient of variation.



## A. Standard in solution digestion

RT : 0.00-120.00

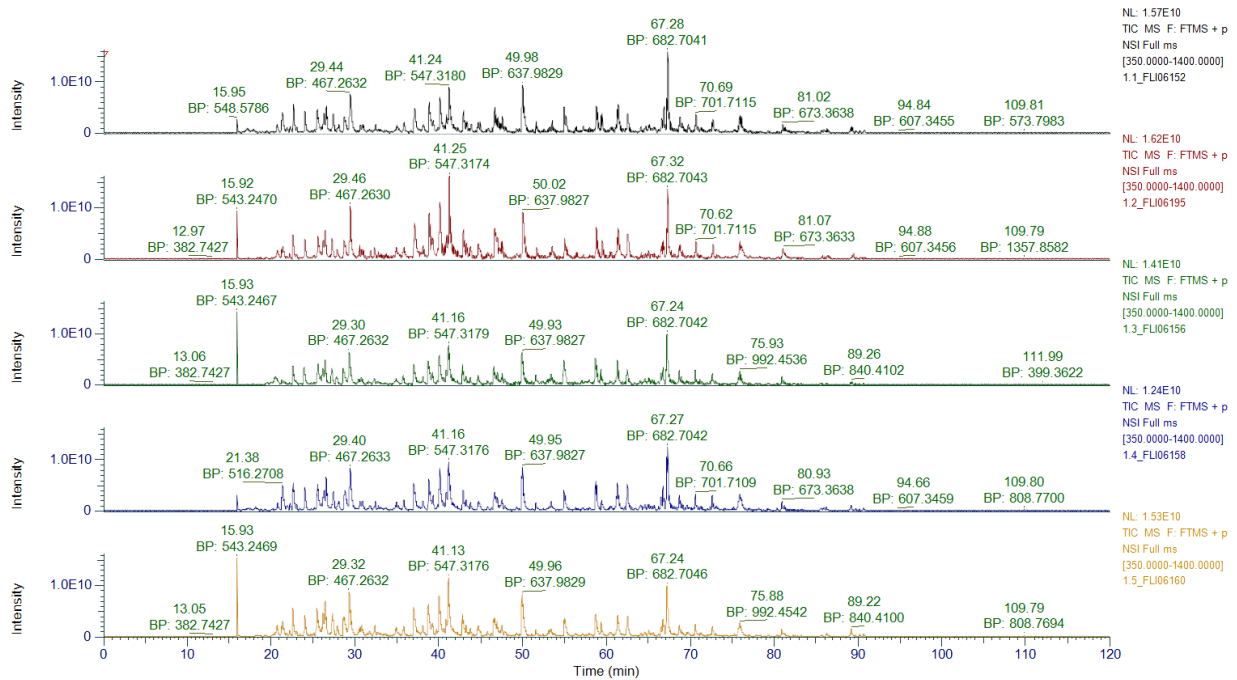

## B. Rapid in solution digestion

RT : 0.00-120.00

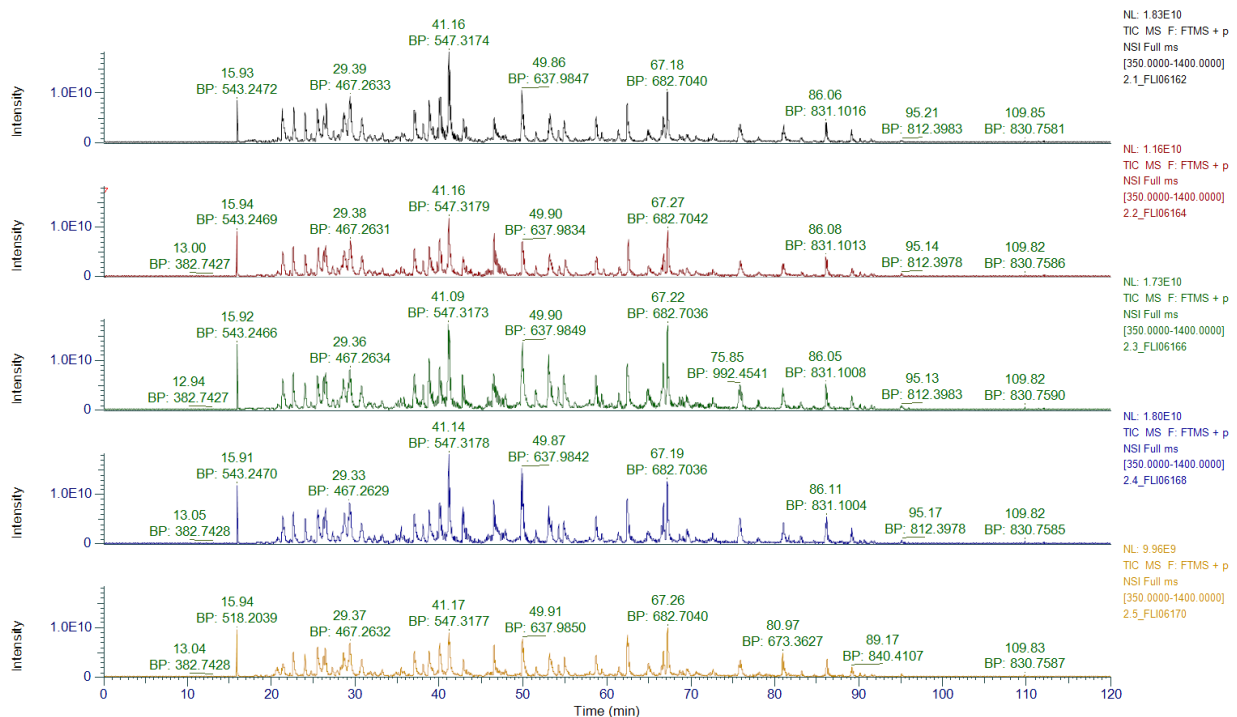

### C. Standard FASP

RT: 0.00-120.00

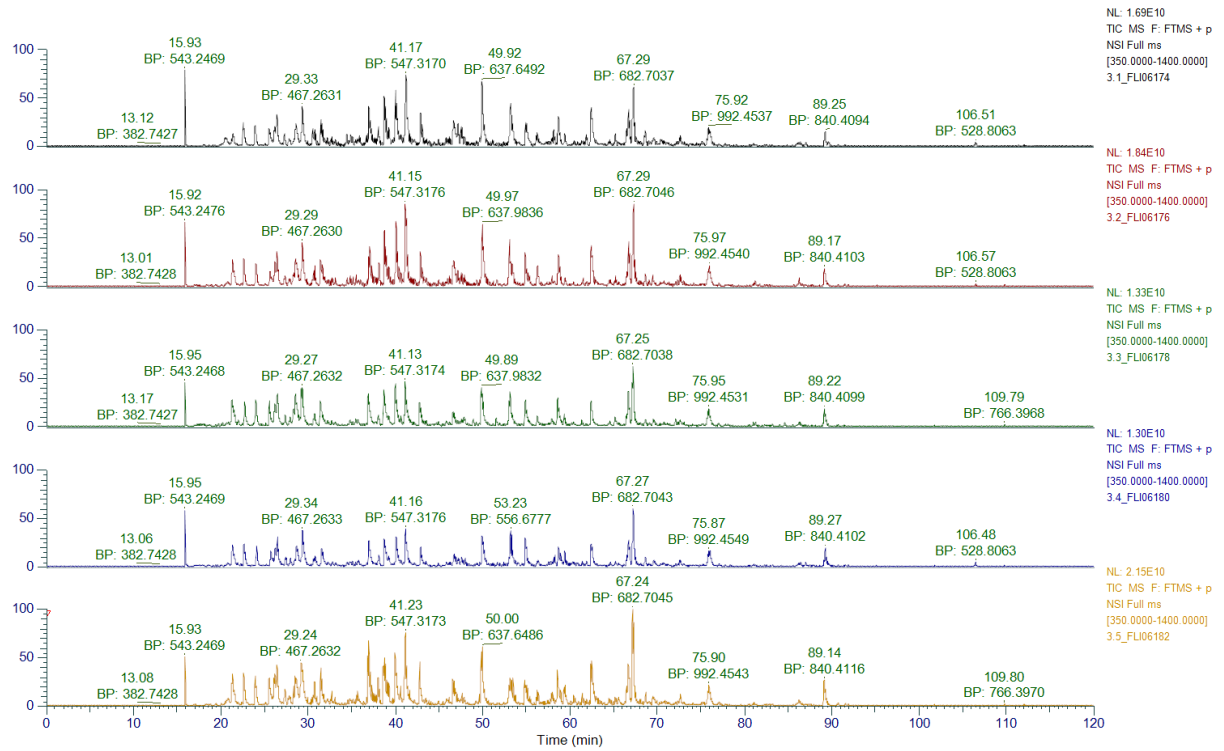

### D. Rapid FASP

RT: 0.00-120.00

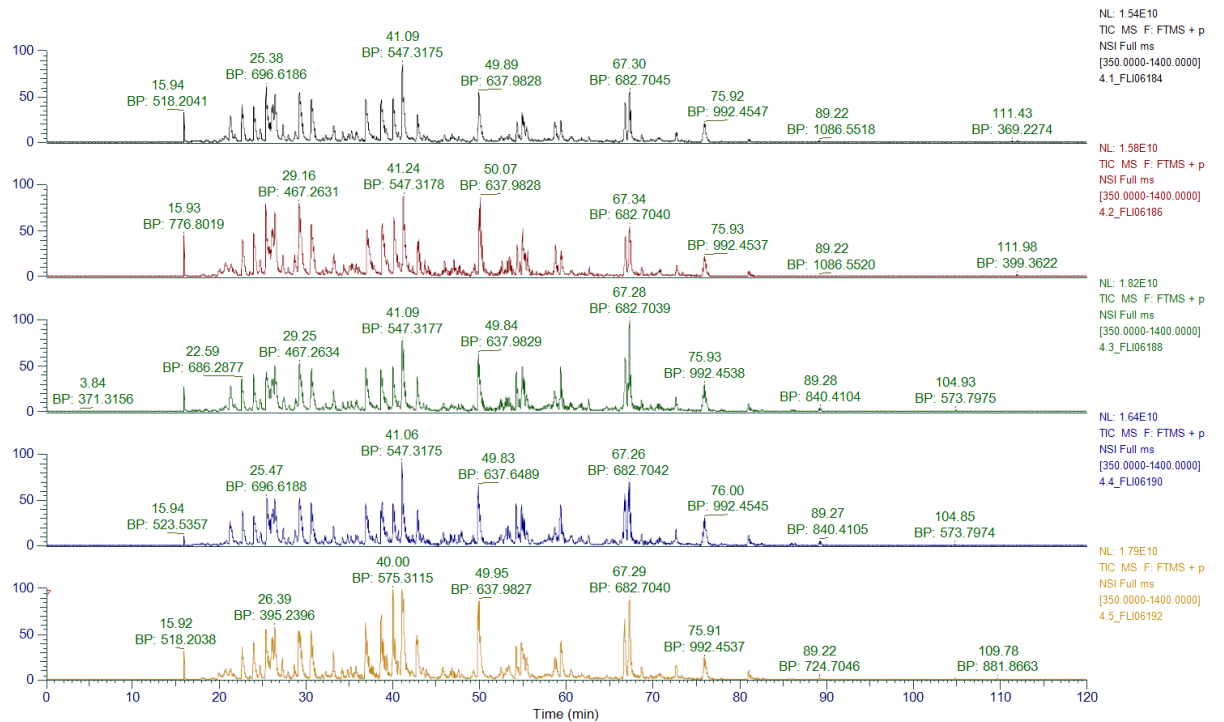

**Figure S2. TIC chromatographic profiles for the technical replicates for different CSF datasets: A – standard in solution digestion, B – rapid in solution digestion, C - standard filter added preparation, D - rapid filter added preparation.**

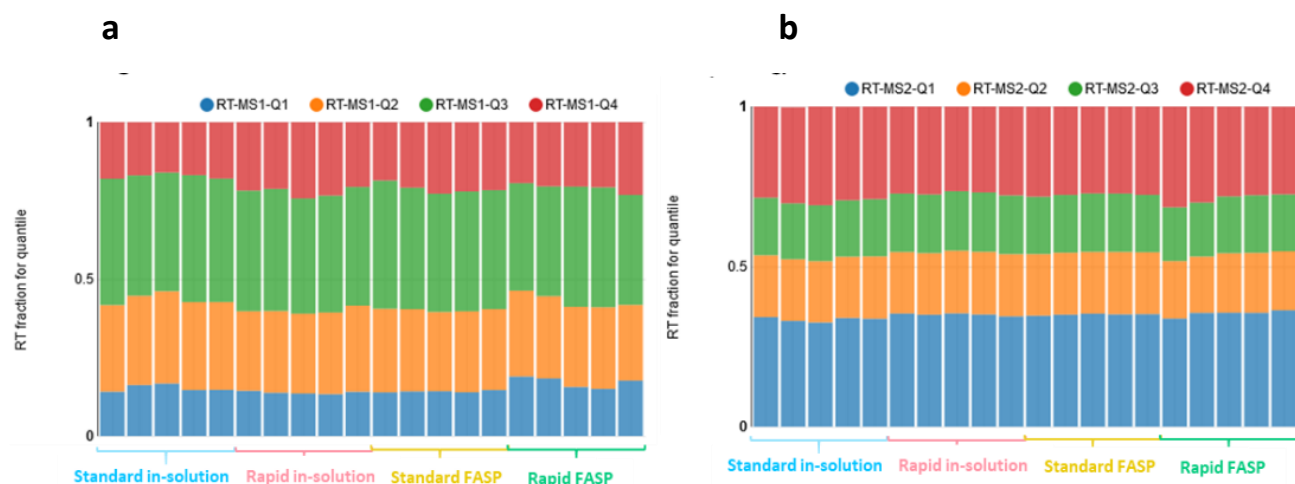

**Figure S3. Raw data quality assessment: quantile analysis of MS1- and MS2- ion intensities.** The similarity of the obtained chromatograms was assessed in *MaCProQC* using TIC quantile analysis on MS1 (a) and MS2 (b) levels, where the quantiles reflect the fraction of the retention time (RT) referring to the 1<sup>st</sup> (RT-TIC-Q1), 2<sup>nd</sup> (RT-TIC-Q2), 3<sup>rd</sup> (RT-TIC-Q3) and 4<sup>th</sup> (RT-TIC-Q4) quarter of the total run's intensity. Slight shifts were seen for the rapid FASP on both MS1 and MS2 levels.

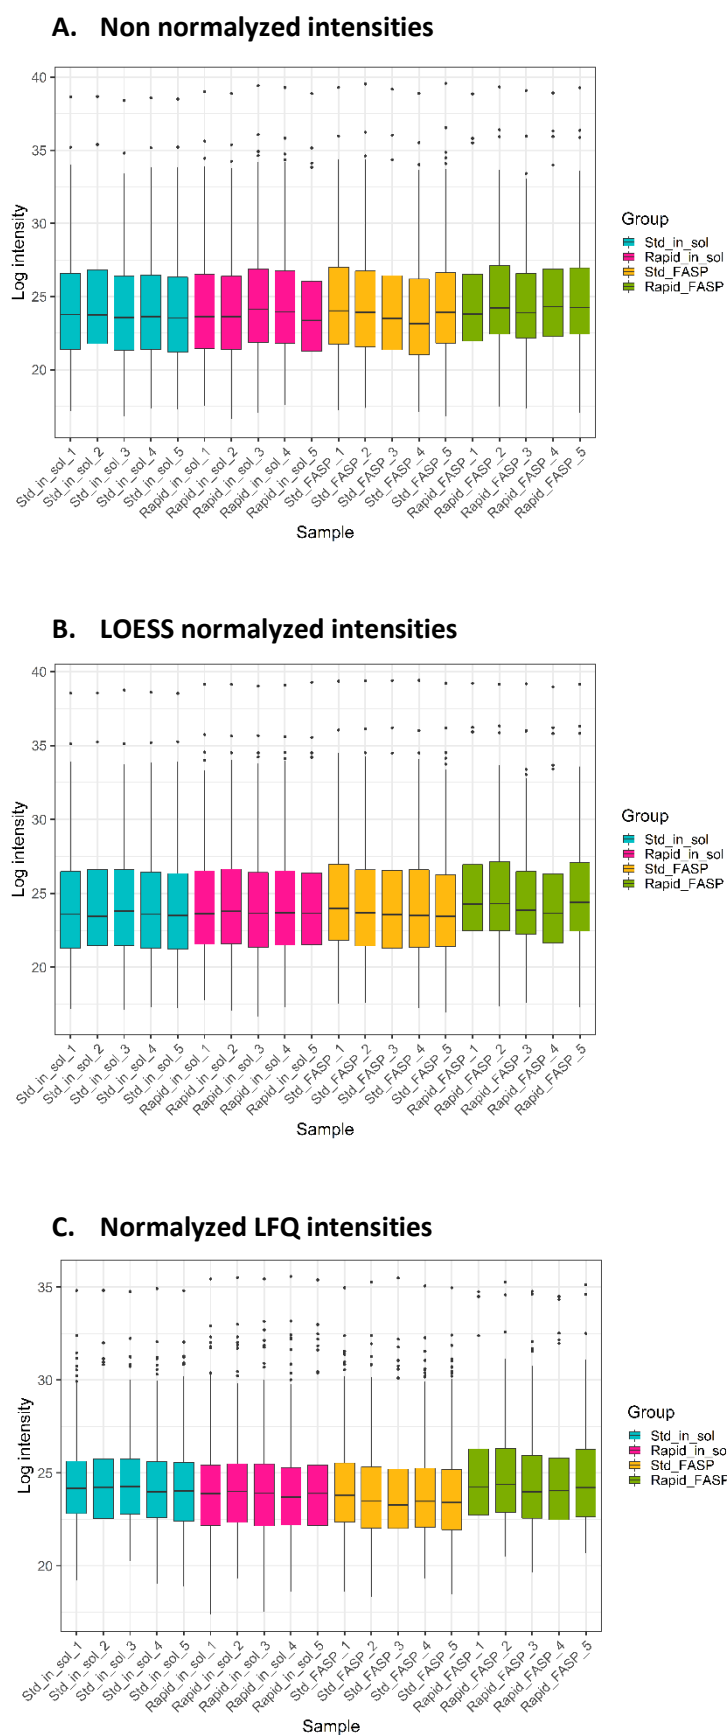

**Figure S4. Box-plots based on the protein intensities:** A- non-normalized; B – separate LOESS normalization; C - LFQ normalization.

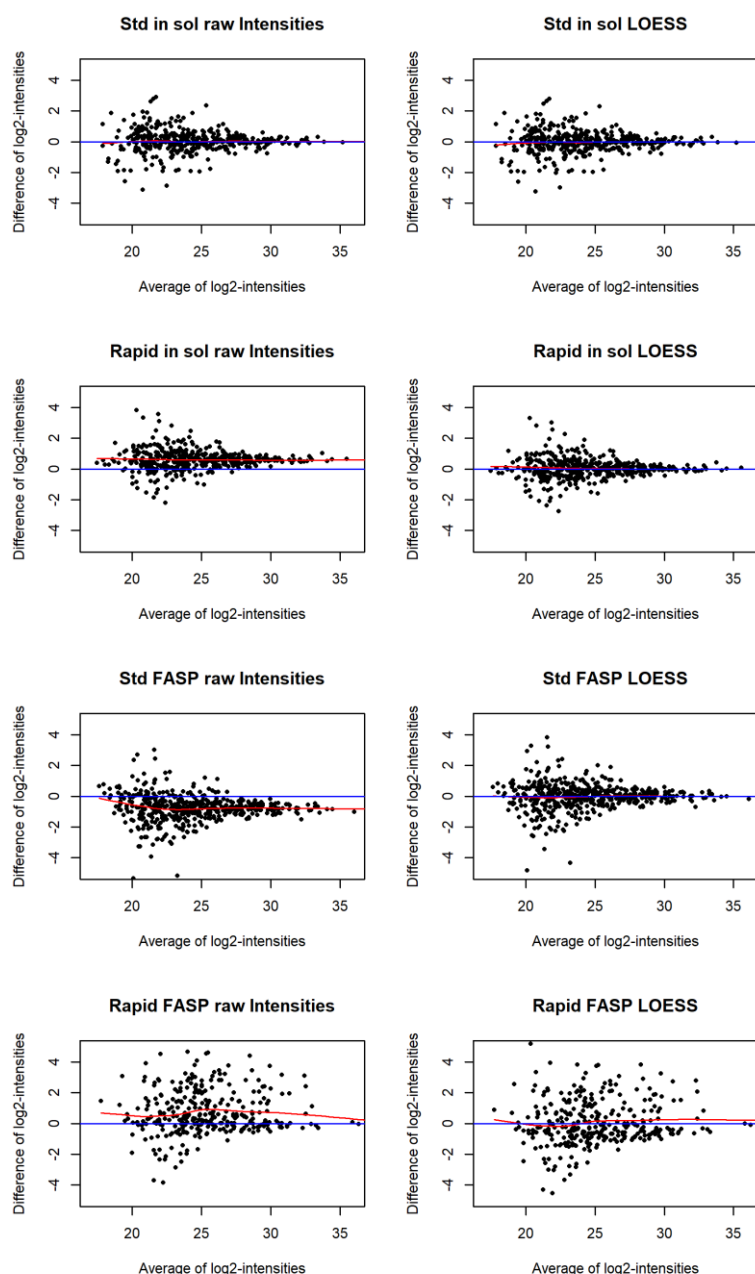

**Figure S5. Analysis of MA-Plots based on raw and LOESS-normalized intensities of PGs.**

Typical MA-Plots comparing the raw (left) and LOESS-normalized intensities (right) of PGs for the 4th and 5th replicate of the respective dataset. Each point represents one protein (low-abundant proteins on the left and the high-abundant proteins on the right). Proteins with a large difference between the two compared samples are at the top or the bottom, those with a small difference are around  $y = 0$  (blue line). The red line is the local regression line fitted to the point cloud. Ideally, this line would be equal to the blue horizontal line at  $y = 0$ . If the red line is shifted from the blue line, this indicates a technical bias. No technical bias was detected for the standard in-solution dataset replicates, while the other dataset had a data bias. For rapid FASP, the spread of the data points along the y-axis is the highest, indicating higher level of variability. Furthermore, the point cloud in the MA-Plot is not as symmetric as for the other groups. LOESS normalization minimized the variance for the standard in-solution and FASP (the red local regression line is closer to the horizontal blue line at  $y = 0$ ). However, the normalization cannot reduce the spread for Rapid FASP and here still the point cloud is asymmetrical to the blue line.
